# Supplementary material for: Marine Microalgae, Spirulina maxima-Derived Modified Pectin and Modified Pectin Nanoparticles Modulate the Gut Microbiota and Trigger Immune Responses in Mice
Source: PubMed Central journal article supplement (PMC7143556; doi:10.3390/md18030175), 2020-03-21
Supplement: marinedrugs-18-00175-s001.pdf [file marinedrugs-18-00175-s001.pdf]

**Supplementary tables**

**Supplementary table S1.** Particle size and zeta potential of modified SmP and modified SmPNPs.

| <b>Product</b>  | <b>Average particle size<br/>(nm)</b> | <b>Zeta potential<br/>(mV)</b> |
|-----------------|---------------------------------------|--------------------------------|
| Modified SmP    | 152.90                                | -24.4                          |
| Modified SmPNPs | 64.11                                 | -24.6                          |

**Supplementary table S2.** Description of the selected genes, related functions and specific primer in this study.

| Accession number  | Gene nam                                               | Main functions              | Primer sequences         |                          |
|-------------------|--------------------------------------------------------|-----------------------------|--------------------------|--------------------------|
|                   |                                                        |                             | Forward (5'-3')          | Reverse (5'-3')          |
| <b>BC034197.1</b> | Mucin 2 (Muc2)                                         | Antimicrobial activity      | ATGCCACCTCCTCAAAGAC      | GTAGTTCCGTTGGAACAGTGAAT  |
| NM_023566.3       | Mucin 3 (Muc3)                                         | Antimicrobial activity      | GTAGTTCCGTTGGAACAGTGAAT  | GCCGTGAATTGTATGAACGGA    |
| NP_034974.1       | Mucin 5ac (Muc5ac)                                     | Antimicrobial function      | GTGGTTTGACACTGACTTCCC    | CTCCTCTCGGTGACAGAGTCT    |
| NM_011575.2       | Trefoil factor 3 (Tff3)                                | Intestinal barrier function | CCTGGTTGCTGGGTCCTCTG     | GCCACGGTTGTTACTGCTC      |
| NR_003146.1       | Defensin $\alpha$ pseudogene 1 (Defa-ps1)              | Antimicrobial activity      | AGACACTAGTCCTCCTCTCTG    | CTGGCTGCTCCTCAGTATTAG    |
| NM_183253.3       | Defensin $\alpha$ 21 (Def $\alpha$ 21)                 | Antimicrobial activity      | CCAGGGGAAGATGACCAGGCTG   | CCAGGGGAAGATGACCAGGCTG   |
| NM_007844.2       | Defensin $\alpha$ 29 (Defa29)                          | Antimicrobial activity      | TCCAGGCTGATCCTATCCAA     | GCCTCCAAAGGAGACAGAAA     |
| NM_013590.4       | Lysozyme 1 (Lyz1)                                      | Antimicrobial function      | GAAGCACCGACTATGGGATATT   | GATCCACAGGCATTCTTAGAT    |
| NM_011259.1       | Regenerating islet-derived 3 $\alpha$ (Reg3 $\alpha$ ) | Bacteriocidic mechanisms    | CTCCTGCCTGTTGTTTGTATTTT  | CATAGCAGTGGGAGCGATAAG    |
| NM_011036.1       | Regenerating islet-derived 3 $\beta$ (Reg3b)           | Bacteriocidic mechanisms    | TACTGCCTTAGACCGTGCTTCTG  | GACATAGGGCAACTTCACCTCACA |
| NM_010846.1       | Myxovirus resistance protein (Mx1)                     | Antiviral activity          | ACAAGCACAGGAAACCGTATCAG  | AGGCAGTTTGGACCATCTTAGTG  |
| NM_015783.3       | Interferon stimulated gene 15 (Isg15)                  | Antiviral activity          | CAATGGCCTGGGACCTAAA      | CTTCTTCAGTTCTGACACCGTCAT |
| NM_010502.2       | Interferon $\alpha$ 1 (Ifn $\alpha$ 1)                 | Antiviral activity          | CTCTCCTGCCTGAAGGACAGGAAG | GGTGGAGGTCATTGCAGAATGAGT |
| NM_031168.2       | Interleukin 6 (Il6)                                    | Antiinflammatory activity   | TCCATCCAGTTGCCTTCTTGG-3  | CCACGATTTCCAGAGAACATG    |

|                |                                                           |                                             |                           |                          |
|----------------|-----------------------------------------------------------|---------------------------------------------|---------------------------|--------------------------|
| NM_010548.2    | Interleukin 10<br>(Il10)                                  | Antiinflammatory<br>activity                | TTGAATTCCTGGGTGAGAAG      | TCCACTGCCTTGCTCTTATTT    |
| NM_001081082.2 | Alkaline<br>phosphatase (Alpi)                            | Maintain<br>microbiome<br>homeostasis       | GGCTACACACTTAGGGGGACCTCCA | AGCTTCGGTGACATTGGGCCGGTT |
| NM_007432.2    | Alkaline<br>phosphatase 3<br>(Akp3)                       | Maintain<br>microbiome<br>homeostasis       | ACATTGCTACACAACCTCATCTCC  | TCCTGCCATCCAATCTGGTTC    |
| NM_011577.2    | Transforming<br>growth factor $\beta$<br>(Tgf- $\beta$ )  | Mediator in gut<br>immunogenic<br>responses | CACCGGAGAGCCCTGGATA       | TGTACAGCTGCCGCACACA      |
| NM_010851.3    | Myeloid<br>differentiation<br>response gene 88<br>(Myd88) | Adaptor function in<br>immune mechanisms    | TCGATGCCTTTATCTGCTACTG    | GGTCGGACACACACAACCTTA    |

## Supplementary figures

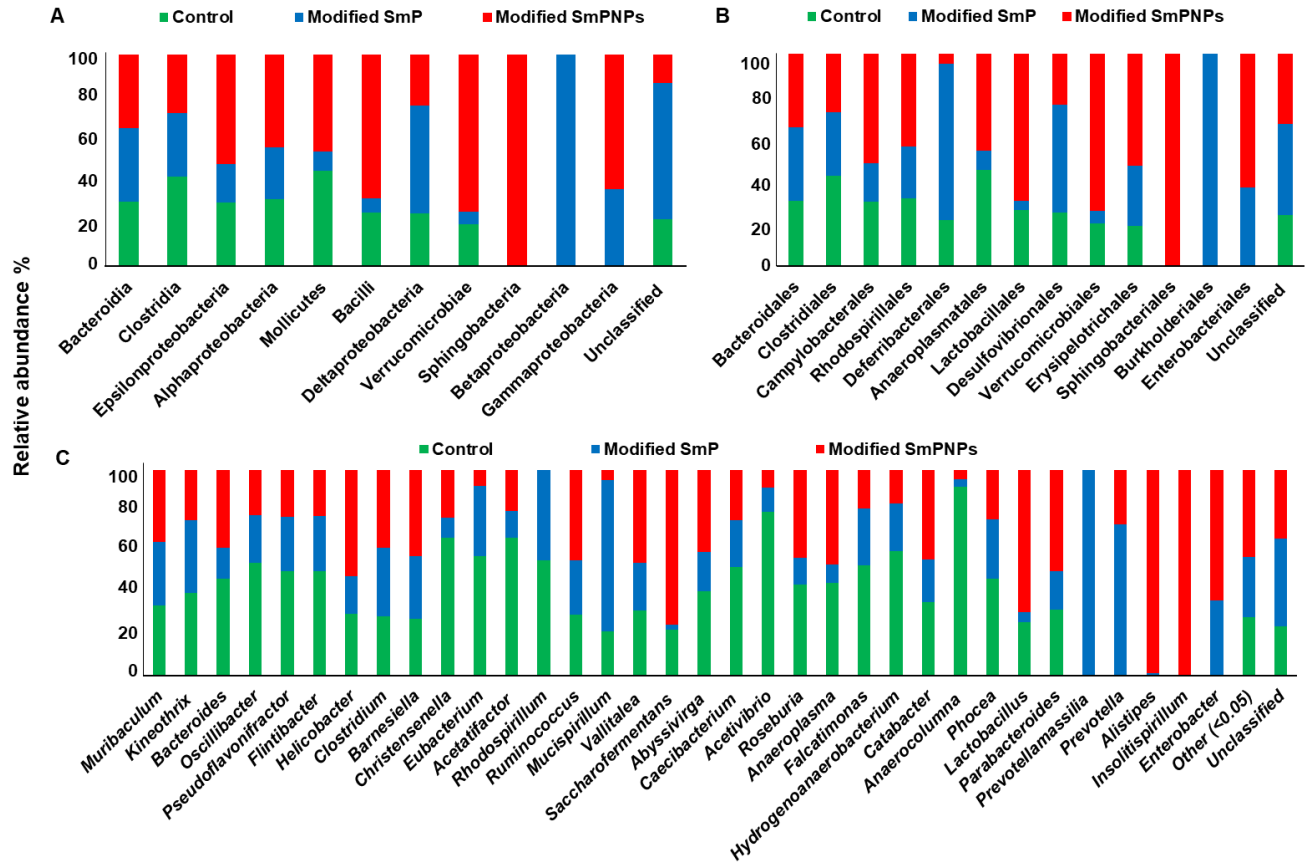

**Supplementary figure S1.** Diet-specific changes on taxonomic composition of fecal microbial community of control, modified SmP and SmPNPs treated mice; (A) Comparison of order level; (B) Comparison of class level; (C) Comparison of genus level.

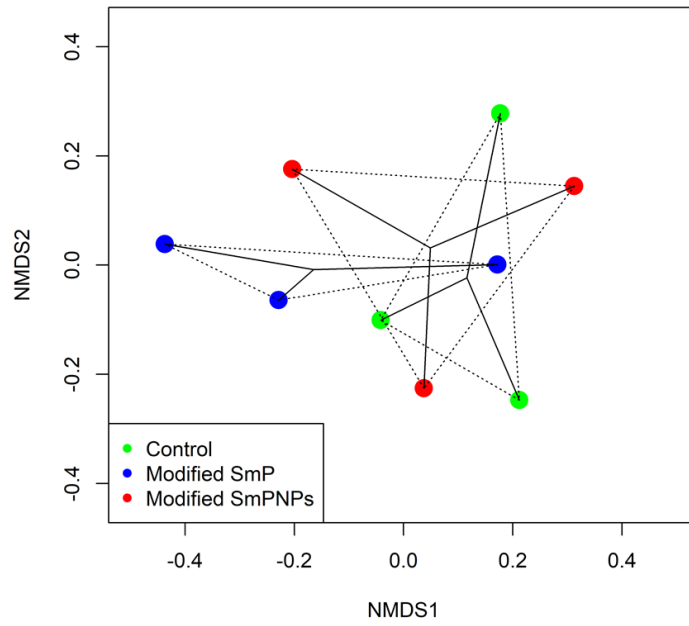

**Supplementary figure S2.** Graphical representation of PERMANOVA analysis of relative abundance of gut microbiota families in control, modified SmP and SmPNPs, computed by Vegan package of R 3.6.1. with 999 permutations for all comparisons. There were no statistically significant ( $p > 0.05$ ) differences among three groups analyzed. The Bray-Curtis distance matrices are visualized using a nonmetric multiple dimensional scaling ((NMDS1) and NMDS2) plot.
